# Supplementary material
Source: ML conference proceedings conference paper supplement (https://proceedings.mlr.press/v119/li20f.html)
Supplement: Supplementary file [file li20f-supp.pdf]

---

# Supplementary Materials for Closed Loop Neural-Symbolic Learning via Integrating Neural Perception, Grammar Parsing, and Symbolic Reasoning

---

## 1. Posterior Approximation

In Section 3.2.3, we formulate the  $m$ -step back search as a Metropolis-Hasting sampler to perform sampling from  $p'(z|x, y)$ , which is a smoothing of the true posterior distribution  $p(z|x, y)$  as shown in Equation 11. Intuitively, as  $\epsilon$  gets smaller, the distance between two distribution  $p'(z|x, y)$  and  $p(z|x, y)$  becomes smaller as well. Accordingly, we have the following lemma proved with Equation 9 and Equation 11:

**Lemma 1.1.** *Given an small  $\epsilon$ , the Kullback–Leibler divergence of  $p'(z|x, y)$  from  $p(z|x, y)$  is  $O(\epsilon)$ .*

*Proof.* From the definition of Kullback–Leibler divergence, we have:

$$KL(p||p') = \sum_z p(z|x, y) \log \frac{p(z|x, y)}{p'(z|x, y)} \quad (1)$$

$$= \sum_z p(z|x, y) \log \left[ \frac{p(y|z)}{p(y|z) + \epsilon} \cdot \frac{\epsilon + \sum_{z'} p(y|z') p_\theta(z'|x)}{\sum_{z'} p(y|z') p_\theta(z'|x)} \right] \quad (2)$$

$$= \sum_{z \in Q} \frac{p_\theta(z|x)}{C} \log \frac{C + \epsilon}{(1 + \epsilon)C} \quad (3)$$

$$= \log \frac{C + \epsilon}{(1 + \epsilon)C} \quad (4)$$

$$= \log(1 + \frac{\epsilon}{C}) - \log(1 + \epsilon) \quad (5)$$

where  $C = \sum_{z'} p(y|z') p_\theta(z'|x) = \sum_{z' \in Q} p_\theta(z'|x)$  is the normalizing constant. With Taylor expansion, we get:

$$\log(1 + \frac{\epsilon}{C}) = \frac{\epsilon}{C} + O(\epsilon^2) \quad (6)$$

$$\log(1 + \epsilon) = \epsilon + O(\epsilon^2) \quad (7)$$

Then we have:

$$KL(p||p') = (\frac{1}{C} - 1)\epsilon + O(\epsilon^2) = O(\epsilon) \quad (8)$$

□

## 2. Handwritten Formula Recognition

### 2.1. Grammar for Math Formulas

For the handwritten formula recognition task, we define the context-free grammar for the mathematical formulas, as

shown in Table 1. This grammar considers only simple arithmetic operations over single-digit numbers. We compute the parsed results using a calculator, which is the symbolic reasoning module in this task.

To be noticed, the proposed method can be extended to more complex computations by designing more complicated grammar.

Table 1. The context-free grammar for the mathematical formulas.

|                                                                 |
|-----------------------------------------------------------------|
| $G = (V, \Sigma, R, S)$                                         |
| $V = \{S, \text{Expression}, \text{Term}, \text{Factor}\}$      |
| $\Sigma = \{+, -, \times, \div, 0, 1, \dots, 9\}$               |
| $S$ is the start symbol.                                        |
| $R = \{$                                                        |
| $S \rightarrow \text{Expression}$                               |
| $\text{Expression} \rightarrow \text{Term}$                     |
| $\text{Expression} \rightarrow \text{Expression} + \text{Term}$ |
| $\text{Expression} \rightarrow \text{Expression} - \text{Term}$ |
| $\text{Term} \rightarrow \text{Factor}$                         |
| $\text{Term} \rightarrow \text{Term} \times \text{Factor}$      |
| $\text{Term} \rightarrow \text{Term} \div \text{Factor}$        |
| $\text{Factor} \rightarrow 0 1 2 3 \dots 9 \}$                  |

### 2.2. Data Generation

We generate the synthetic dataset based on CROHME 2019 Offline Handwritten Formula Recognition Task<sup>1</sup>. First, we extract all the image patches of symbols from CROHME and only keep ten digits (0~9) and four basic operators (+, -, ×, ÷). We split these images of symbols into a training symbol set (80%) and a testing symbol set (20%). Then we generate formulas by randomly sampling production rules from the predefined grammar. For the training set, we generate 1K formulas with length 1 (1 digit, 0 operator), 1K formulas with length 3 (2 digits, 1 operator), 2K formulas with length 5 (3 digits, 2 operators), and 6K formulas with length 7 (4 digits, 3 operators). For the test set, we generate 200 formulas with length 1, 200 formulas with length 3, 400 formulas with length 5, and 1,200 formulas with length 7. For each formula in the training/test set, we randomly select symbol images from the training/test symbol set. In this way, one symbol image can not exist in both the training set and the test set. Overall, our dataset contains 10K training formulas and 2K test formulas. The generated dataset is also submitted with the code.

<sup>1</sup><https://www.cs.rit.edu/~crohme2019/task.html>

000  
001  
002  
003  
004  
005  
006  
007  
008  
009  
010  
011  
012  
013  
014  
015  
016  
017  
018  
019  
020  
021  
022  
023  
024  
025  
026  
027  
028  
029  
030  
031  
032  
033  
034  
035  
036  
037  
038  
039  
040  
041  
042  
043  
044  
045  
046  
047  
048  
049  
050  
051  
052  
053  
054

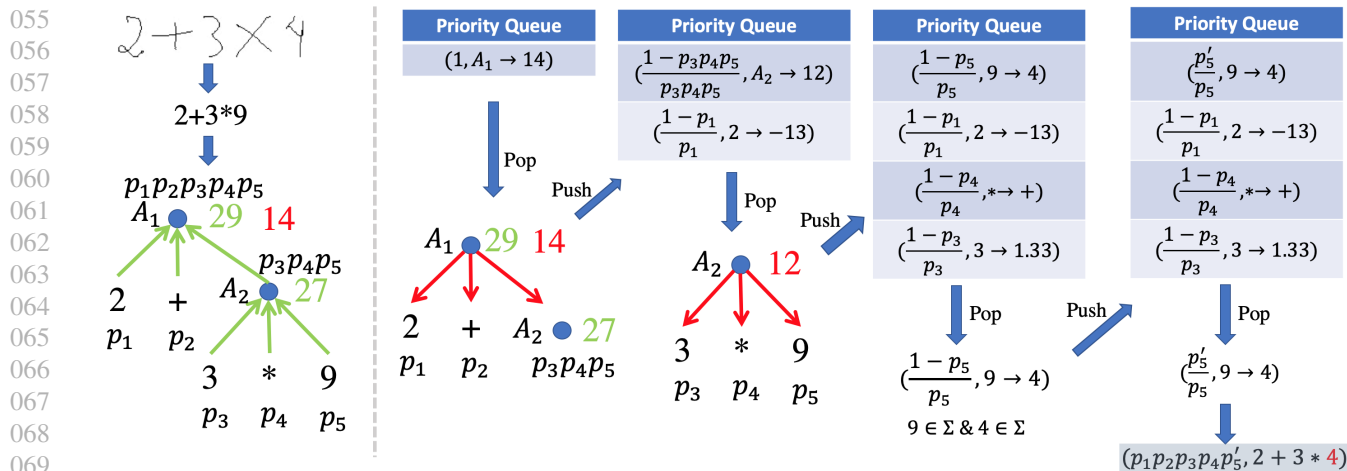

Figure 1. An illustrative example of the 1-BS process. The priority queue ranks the possible corrections to the original results with visiting priority, which reflects the potential of changing the current node or its child nodes to correct the wrong answer.

### 2.3. Training Details

For the proposed Neural-Grammar-Symbolic models, we use LeNet as the neural perception module and train the models for 100K iterations using the Adam optimizer with a fixed learning rate of  $5 \times 10^{-4}$  and a batch size of 64. For the REINFORCE and reproduced MAPO baselines, we set the reward decay as 0.99. For more details in the implementation and reproduction of the experiment results, please refer to the submitted code.

### 2.4. Qualitative Examples

Figure 1 shows an illustrative example of the 1-BS process implemented with a priority queue. Figure 2 shows several examples of correcting the wrong predictions using the  $m$ -BS algorithms.

## 3. Neural-Symbolic VQA

### 3.1. Grammar for CLEVR programs

The grammar model in the neural-symbolic VQA task ensures the generated sequence of function modules can form a valid program, which indicates the inputs and outputs of these modules can be strictly matched. Table 3 groups all function modules by the inputs and output types and Table 2 gives the context-free grammar for the CLEVR programs.

### 3.2. Implementation Details

The structure of the NGS model is shown in Figure 3. To get the structural scene representations, we train a scene parser following (Yi et al., 2018). Specifically, Mask-RCNN (He et al., 2017) is used to generate segment proposals of all objects in each image. Along with the segmentation mask, the network also predicts the categorical labels of discrete

Table 2. The context-free grammar for the CLEVR programs.

| $G = (V, \Sigma, R, S)$                                                      |
|------------------------------------------------------------------------------|
| $V = \{S, \text{ObjectSet}, \text{Concept}, \text{Integer}, \text{Object}\}$ |
| $\Sigma$ is the set of all modules as listed in Table 3.                     |
| $S$ is the start symbol.                                                     |
| $R = \{$                                                                     |
| $S \rightarrow \text{count ObjectSet}$                                       |
| $S \rightarrow \text{equal\_attribute Concept Concept}$                      |
| $S \rightarrow \text{exist ObjectSet}$                                       |
| $S \rightarrow \text{greater\_than Integer Integer}$                         |
| $S \rightarrow \text{less\_than Integer Integer}$                            |
| $S \rightarrow \text{equal\_integer Integer Integer}$                        |
| $S \rightarrow \text{query\_attribute Object}$                               |
| $\text{ObjectSet} \rightarrow \text{scene}$                                  |
| $\text{ObjectSet} \rightarrow \text{filter\_attribute[concept] ObjectSet}$   |
| $\text{ObjectSet} \rightarrow \text{intersection ObjectSet ObjectSet}$       |
| $\text{ObjectSet} \rightarrow \text{union ObjectSet ObjectSet}$              |
| $\text{ObjectSet} \rightarrow \text{relate[RelConcept] Object}$              |
| $\text{ObjectSet} \rightarrow \text{same\_attribute Object}$                 |
| $\text{Concept} \rightarrow \text{query\_attribute Object}$                  |
| $\text{Integer} \rightarrow \text{count ObjectSet}$                          |
| $\text{Object} \rightarrow \text{unique ObjectSet} \}$                       |

intrinsic attributes such as color, material, size, and shape. The segment for each object is then paired with the original image and sent to a ResNet-34 to extract the spatial attributes such as pose and 3D coordinates. Both networks of the scene parser are trained on 4,000 generated CLEVR images with full annotations. Please refer to (Yi et al., 2018) for more training details of the scene parser.

Instead of the attention-based seq2seq model used by (Yi et al., 2018), we use a Pointer Network as the question parser. Considering the small vocabulary of the CLEVR questions, we can easily build a dictionary to map the keywords in the question to the corresponding modules. Therefore, for each question, we can extract a set of functional modules, and the ground-truth program is a permutation of this set

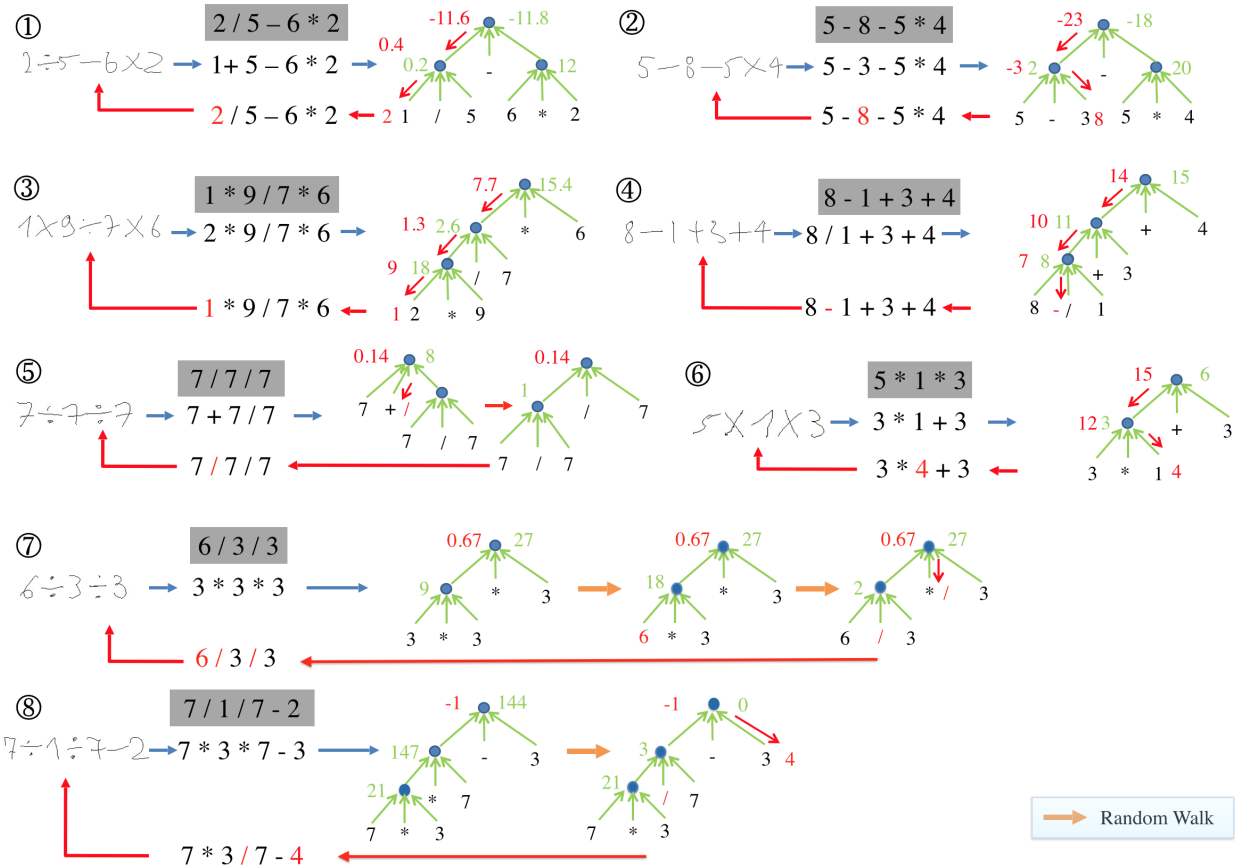

Figure 2. Examples of correcting the wrong predictions using the proposed  $m$ -BS algorithm. Some of the wrong predictions are corrected with the randomly sampled random walks noted by the yellow arrows. (6) and (8) are the spurious examples mentioned in Section 4.1.2

of modules. In the Pointer Network, both the encoder and decoder are two-layer LSTMs with 256 hidden units. We set the dimensions of both the encoder and decoder word embedding to 300. The Pointer Network works as the neural perception module in the proposed NGS model. Unlike (Yi et al., 2018), we do not need to pre-train the question parser on a small set of ground-truth question-program pairs.

The symbolic reasoning module in this task executes the generated program on the structural scene representations. The program executor is implemented as a collection of deterministic, generic functions in Python, designed to host all the functional modules in the CLEVR programs. Each function is in one-to-one correspondence with a module from the input program sequence, which has the same representation as in (Johnson et al., 2017; Yi et al., 2018). The execution of a program tree starts from the leaf nodes with scene tokens and continues until the root node, which outputs the final answer to the question.

Since the set of the functional modules is given for each question, the 1-step back search algorithm works by *switching* two modules that belong to the same group according to

Table 3.

All models are trained with 30K iterations using the Adam optimizer with a fixed learning rate of  $1 \times 10^{-5}$  and a batch size of 64. For the REINFORCE and MAPO baselines, we set the reward decay as 0.99.

### 3.3. Qualitative Examples

Figure 4 shows several illustrative examples of correcting the wrong programs using the 1-BS model.

## References

He, K., Gkioxari, G., Dollár, P., and Girshick, R. Mask r-cnn. In *ICCV*, 2017.

Johnson, J., Hariharan, B., Van Der Maaten, L., Hoffman, J., Fei-Fei, L., Lawrence Zitnick, C., and Girshick, R. Inferring and executing programs for visual reasoning. In *ICCV*, 2017.

Yi, K., Wu, J., Gan, C., Torralba, A., Kohli, P., and Tenenbaum, J. Neural-symbolic vqa: Disentangling reasoning from vision and language understanding. In *NeurIPS*, 2018.

Table 3. Modules in the CLEVR programs. They are grouped by their inputs and output signatures. Modules listed in the same group (row) can replace each other while keeping the program valid.

| Modules                                | Inputs               | Output    | Semantics                                                         |
|----------------------------------------|----------------------|-----------|-------------------------------------------------------------------|
| scene                                  | $\emptyset$          | ObjectSet | Return all objects in the scene.                                  |
| count                                  | ObjectSet            | Integer   | Count the number of objects in the input object set.              |
| equal_attribute                        | Concept, Concept     | Bool      | Check if two input concepts equal.                                |
| exist                                  | ObjectSet            | Bool      | Check if the object set is empty.                                 |
| filter_attribute[concept]              | ObjectSet            | ObjectSet | Filter out a set of objects having the object-level concept       |
| intersection, union                    | ObjectSet, ObjectSet | ObjectSet | Return the intersection or union of two object sets.              |
| greater_than, less_than, equal_integer | Integer, Integer     | Bool      | Compare two integers.                                             |
| query_attribute                        | Object               | Concept   | Query the attribute (e.g., color) of the input object.            |
| relate[RelConcept], same_attribute     | Object               | ObjectSet | Filter out objects with the relational concept or same attribute. |
| unique                                 | ObjectSet            | Object    | Return the unique object in the object set.                       |

**Q: How many cubes that are behind the cylinder are large?**

{scene, unique, count, filter\_shape[cube], relate[behind], filter\_shape[cylinder], filter\_size[large]}

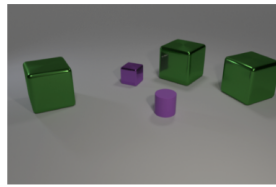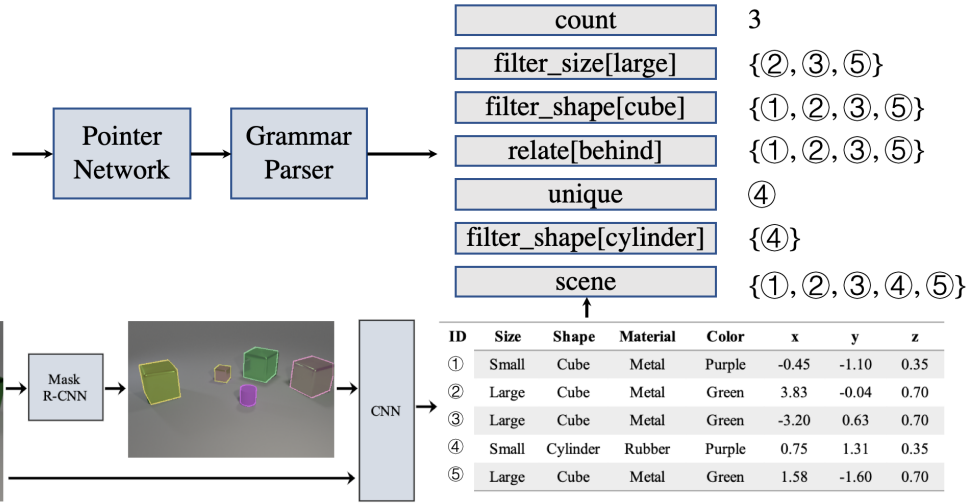

Figure 3. The Neural-Grammar-Symbolic VQA model for the CLEVR dataset.

**Q: How many shiny objects are there? A: 2**

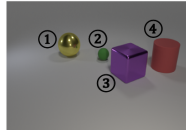

count 2  
filter\_material[metal] {①, ③}  
scene {①, ②, ③, ④}

**Q: What is the size of the purple thing? A: large**

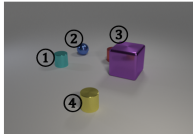

query\_size large  
unique ③  
filter\_color[purple] {③}  
scene {①, ②, ③, ④}

**Q: Are there any cylinders behind the brown ball? A: no**

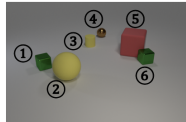

exist Error  
filter\_color[brown] Error  
relate[behind] Error  
unique Error  
filter\_shape[sphere] {}  
filter\_shape[cylinder] {③}  
scene {①, ②, ③, ④, ⑤, ⑥}

1-BS →

exist no  
filter\_shape[cylinder] {}  
relate[behind] {}  
unique ④  
filter\_shape[sphere] {④}  
filter\_color[brown] {④}  
scene {①, ②, ③, ④, ⑤, ⑥}

**Q: How many cubes are either tiny blue objects or metal things? A: 0**

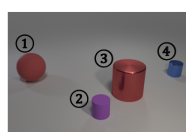

count 1  
filter\_color[blue] {④}  
union {③, ④}  
filter\_shape[cube] {}  
filter\_size[small] {②, ④}  
filter\_material[metal] {③, ④}  
scene {①, ②, ③, ④}

1-BS →

count 0  
filter\_shape[cube] {}  
union {③, ④}  
filter\_color[blue] {④}  
filter\_size[small] {②, ④}  
filter\_material[metal] {③, ④}  
scene {①, ②, ③, ④}

Figure 4. Illustrative examples of correcting the wrong programs using the 1-BS algorithm. \*\*\* denotes the switched modules in the 1-BS algorithm. In the first two simple examples, given the set of the functional modules, only one permutation can form a valid program, and we do not need to use the back search algorithm. In another two examples, 1-BS successfully finds the correct programs.
